# Supplementary material for: Epidemiology and contact tracing assessment of COVID-19 and potential risk of transmission at different exposure settings: A prospective cohort study
Source: Research Square preprint supplement (doi:10.21203/rs.3.rs-442709/v1), 2021-04-22
Supplement: Supplementary file 2 [file 5fd1cbd09f29db0f8846254e.docx]

**Supplementary Table S1. Distribution of key COVID-19 distribution parameters with 95% confidence intervals**

| **Variables** | **Median estimates**  **(95% CI)** | **Distributions** | **Parameters**  **Shape (95% CI) Scale (95% CI)** | |
| --- | --- | --- | --- | --- |
| **Incubation Period** | | | | |
| Contact-based | 3.9 (3.52-4.28) | gamma | 3.92 (3.53-4.30) | 1.01 (0.97-1.19) |
| Symptom-based | 4.1(3.81-4.39) | gamma | 4.12 (3.83-4.41) | 0.99 (0.85-1.13) |
| **Serial Interval** | | | | |
| Contact-based | 2.0 (1.78-2.22) | gamma | 3.08 (2.83-3.33) | 0.65 (0.53-0.75) |
| Symptom-based | 3.0 (1.78-2.22) | gamma | 3.01 (2.76-3.23) | 1.01(0.50-0.78) |
