# Supplementary material for: Epidemiology and contact tracing assessment of COVID-19 and potential risk of transmission at different exposure settings: A prospective cohort study
Source: Research Square preprint supplement (doi:10.21203/rs.3.rs-442709/v1), 2021-04-22
Supplement: Supplementary file 3 [file 784c3b429251cc121e35e8d4.docx]

|  | **Total lab confirmed cases** | **Deaths** | **Case fatality ratio** | **Crude cases fatality ratio (%)** | **95% CI**  **Lower Upper** | |
| --- | --- | --- | --- | --- | --- | --- |
| **Overall** | 291 | 17 | 0.058 | 5.84 | 4.69 | 6.99 |
| **Sex** | | | | | | |
| Male | 213 | 13 | 0.06 | 6.10 | 4.50 | 7.18 |
| Female | 78 | 4 | 0.05 | 5.13 | 2.92 | 7.34 |
| **Age** | | | | | | |
| 0-9 | 0 | 0 | 0 | 0 | 0 | 0 |
| 10-19 | 5 | 0 | 0 | 0 | 0 | 0 |
| 20-29 | 24 | 0 | 0 | 0 | 0 | 0 |
| 30-39 | 59 | 1 | 0.02 | 1.69 | -0.86 | 4.24 |
| 40-49 | 67 | 1 | 0.01 | 1.49 | -0.90 | 3.88 |
| 50-59 | 71 | 5 | 0.07 | 7.04 | 4.71 | 9.36 |
| 60-69 | 27 | 4 | 0.14 | 14.81 | 11.03 | 18.58 |
| 70-79 | 20 | 5 | 0.25 | 25.0 | 20.62 | 29.38 |
| 80+ | 18 | 3 | 0.17 | 16.67 | 12.05 | 21.29 |
| **Binary age category** | | | | | | |
| <60 years | 226 | 7 | 0.030 | 3.09 | 1.77 | 4.40 |
| >60 years | 65 | 12 | 00.18 | 18.46 | 16.03 | 20.89 |

**Supplementary Table S2. Estimates of crude case fatality ratio from all (n=291) of contact based and surveillance-based cases.**
