# Supplementary material for: Epidemiology and contact tracing assessment of COVID-19 and potential risk of transmission at different exposure settings: A prospective cohort study
Source: Research Square preprint supplement (doi:10.21203/rs.3.rs-442709/v1), 2021-04-22
Supplement: Supplementary file 4 [file b53431bb6eaca03d3122706f.docx]

**Supplementary Table S4. The estimated distribution of serial interval for overall and each infection settings with 95% confidence interval**

| **Exposure settings** | **Median estimates (95% CI)** | **Parameters**  **Scale (95% CI) Shape (95% CI)** | |
| --- | --- | --- | --- |
| **Overall** | 4.1 (3.41-4.79) | 0.99 (0.67-1.31) | 4.12 (3.46-4.78) |
| **Household** | 3.3 (2.20-4.46) | 1.00 (0.38-1.62) | 3.29 (2.16-4.40) |
| **Health care facility** | 5.1 (3.72-6.48) | 1.03 (-0.36-2.42) | 4.96 (1.87-8.05) |
| **Funeral** | 4.6 (1.62-7.58) | 1.01 (-0.37-2.43) | 4.62 (1.64-7.60) |
| **Work places** | 4.1 (2.60-5.60) | 0.99 (0.26-1.74) | 4.12 (2.62-5.62) |
| **Family** | 3.9 (2.32-5.48) | 0.99 (0.20-1.78) | 3.92 (2.33-5.50) |
| **Other** | 4.4 (2.72-6.08) | 0.92 (0.15-1.69) | 4.79 (3.04-6.54) |
