# Supplementary material for: Epidemiology and contact tracing assessment of COVID-19 and potential risk of transmission at different exposure settings: A prospective cohort study
Source: Research Square preprint supplement (doi:10.21203/rs.3.rs-442709/v1), 2021-04-22
Supplement: Supplementary file 5 [file 5d2590203153531b2085e6a0.docx]

| **Exposure settings** | **Median estimates (95% CI)** | **Parameters**  **Scale (95% CI) Shape (95% CI)** | |
| --- | --- | --- | --- |
| **Overall** | 3.9 (3.41-4.79) | 0.99 (0.67-1.30) | 4.12 (3.45-4.78) |
| **Household** | 2.5 (1.52-3.48) | 1.02 (0.40-1.64) | 2.44 (1.47-3.41) |
| **Health care facility** | 4.8 (1.76-7.84) | 1.01 (-0.40-2.38) | 4.80 (1.76-7.76) |
| **Funeral** | 4.3 (1.43-7.17) | 0.99 (-0.36-2.38) | 4.31(1.43-7.20) |
| **Work places** | 4.7 (3.09-6.31) | 1.00 (0.26-1.74) | 4.69 (3.09-6.31) |
| **Family** | 4.0 (2.51-5.48) | 1.0 (0.12-1.80) | 4.0 (2.40-5.60) |
| **Other** | 4.7 (2.96-6.44) | 0.99 (0.20-1.78) | 4.73 (2.99-6.47) |

**Supplementary Table S3. The estimated distribution of incubation for overall and each infection settings with 95% confidence interval**
